# Supplementary material for: Structural evolution of SiO2–ZrO2 nano-sol intercalated clays upon pillaring reactionElectronic supplementary information (ESI) available: BJH pore size distribution and k3-weighted EXAFS spectra of the SiO2–ZrO2 sol-pillared clay at different calcination temperatures. See http://www.rsc.org/suppdata/jm/b2/b208929g/
Source: Royal Society of Chemistry journal article supplement (doi:10.1039/b208929g), 2003-01-28
Supplement: b208929g1.pdf [file b208929g1.pdf]

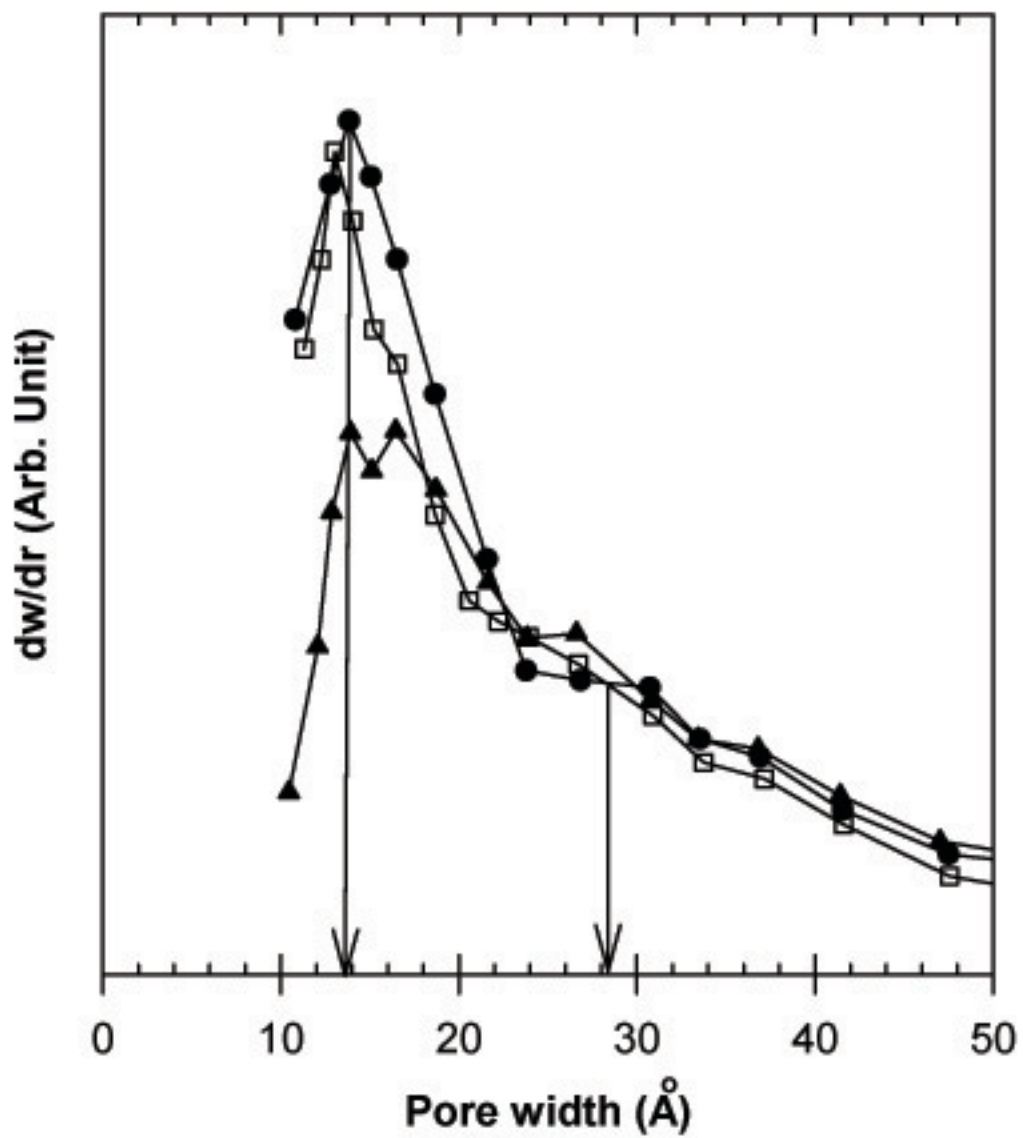

BJH pore-size distribution for  $\text{SiO}_2/\text{ZrO}_2$  sol-pillared clay dependent on calcination temperature. SZPC-300 (open squares), SZPC-400 (closed circles), and SZPC-500 (closed triangles).
